# Supplementary material
Source: PubMed Central journal article supplement (PMC9243270)
Supplement: jcsm.9972.sm001.pdf [file jcsm.9972.sm001.pdf]

**Table S1**—Sociodemographic and biomedical characteristics of participants overall and according to OSA status.

| <b>Participant Characteristic</b>          | <b>Total<br/>(n = 1,475)<br/><br/>% (n)</b> | <b>High Risk#<br/>OSA<br/>(n = 1015)<br/><br/>% (n)</b> | <b>Diagnosed<br/>OSA<br/>(n = 460)<br/><br/>% (n)</b> | <b>P*</b> |
|--------------------------------------------|---------------------------------------------|---------------------------------------------------------|-------------------------------------------------------|-----------|
| Sex                                        |                                             |                                                         |                                                       |           |
| Male                                       | 48.4 (714)                                  | 44.5 (452)                                              | 57.0 (262)                                            | <0.001    |
| Female                                     | 51.6 (761)                                  | 55.5 (563)                                              | 43.0 (198)                                            |           |
| Age, years                                 |                                             |                                                         |                                                       |           |
| 18-24                                      | 1.8 (26)                                    | 0.9 (9)                                                 | 3.7 (17)                                              | <0.001    |
| 25-34                                      | 6.4 (95)                                    | 3.5 (36)                                                | 12.8 (59)                                             |           |
| 35-44                                      | 13.4 (198)                                  | 11.6 (118)                                              | 17.4 (80)                                             |           |
| 45-54                                      | 22.9 (338)                                  | 24.0 (244)                                              | 20.4 (94)                                             |           |
| 55-64                                      | 26.3 (388)                                  | 29.1 (295)                                              | 20.2 (93)                                             |           |
| ≥65                                        | 29.2 (430)                                  | 30.8 (313)                                              | 25.4 (117)                                            |           |
| Area of residence                          |                                             |                                                         |                                                       |           |
| Metro                                      | 64.7 (954)                                  | 62.9 (638)                                              | 68.7 (316)                                            | 0.030     |
| Regional                                   | 35.3 (521)                                  | 37.1 (377)                                              | 31.3(144)                                             |           |
| Annual household income                    |                                             |                                                         |                                                       | 0.190     |
| <\$20,000                                  | 5.1 (75)                                    | 4.9 (50)                                                | 5.4 (25)                                              |           |
| \$20,001-\$40,000                          | 22.7 (335)                                  | 23.2 (235)                                              | 21.7 (100)                                            |           |
| \$40,001-\$60,000                          | 16.5 (243)                                  | 17.3 (176)                                              | 14.6 (67)                                             |           |
| \$60,001-\$80,000                          | 12.5 (185)                                  | 12.2 (124)                                              | 13.3 (61)                                             |           |
| \$80,001-\$100,000                         | 12.0 (177)                                  | 11.4 (116)                                              | 13.3 (61)                                             |           |
| \$100,001-\$150,000                        | 13.3 (196)                                  | 12.8 (130)                                              | 14.3 (66)                                             |           |
| >\$150,000                                 | 9.1 (134)                                   | 8.3 (84)                                                | 10.9 (50)                                             |           |
| Don't know/refused                         | 8.8 (130)                                   | 9.9 (100)                                               | 6.5 (30)                                              |           |
| Highest education                          |                                             |                                                         |                                                       | 0.003     |
| High school or less                        | 33.6 (495)                                  | 35.2 (357)                                              | 30.0 (138)                                            |           |
| Certificate/diploma/trade qualification    | 35.7 (527)                                  | 37.1 (377)                                              | 32.6 (150)                                            |           |
| Bachelor's degree or higher                | 29.2 (431)                                  | 26.3 (267)                                              | 35.7 (164)                                            |           |
| Other                                      | 1.5 (22)                                    | 1.4 (14)                                                | 1.7 (8)                                               |           |
| SEIFA-IRSD quintiles                       |                                             |                                                         |                                                       |           |
| 1 most disadvantage                        | 16.3 (240)                                  | 17.0 (172)                                              | 14.8 (68)                                             | 0.782     |
| 2                                          | 21.6 (318)                                  | 22.0 (223)                                              | 20.7 (95)                                             |           |
| 3                                          | 20.0 (2940)                                 | 19.6 (199)                                              | 20.7 (95)                                             |           |
| 4                                          | 21.1 (311)                                  | 20.7 (210)                                              | 22.0 (101)                                            |           |
| 5 least disadvantage                       | 21.0 (310)                                  | 20.7 (210)                                              | 21.8 (100)                                            |           |
| Country of birth Australia                 | 77.8 (1121)                                 | 77.3 (771)                                              | 78.8 (350)                                            | 0.871     |
| Language spoken at home other than English | 7.3 (107)                                   | 6.2 (63)                                                | 9.6 (44)                                              | 0.021     |
| BMI, kg/m <sup>2</sup>                     |                                             |                                                         |                                                       |           |

|                 |            |            |            |        |
|-----------------|------------|------------|------------|--------|
| < 25.0          | 18.8 (241) | 16.1 (144) | 24.9 (97)  | 0.001  |
| 25.0-29.9       | 32.5 (417) | 34.2 (305) | 28.7 (112) |        |
| ≥ 30.0          | 48.7 (624) | 49.7 (443) | 46.4 (181) |        |
| Current smoking | 27.0 (398) | 25.0 (254) | 31.3 (144) | <0.001 |

#OSA-50 score of  $\geq 5$  identified patients at high risk of having moderate to severe OSA.

\*Chi-square p for distribution by OSA status.

Australian Bureau of Statistics' Socio-Economic Indexes for Areas (SEIFA) Index of Relative Socioeconomic Disadvantage (IRSD). Low levels indicate greater disadvantage.

**Table S2**—Prevalence of ever diagnosed cardiovascular conditions in relation to OSA diagnosis and sex.

| Cardiovascular Conditions               | Males          |               |                    | Females        |               |                    |
|-----------------------------------------|----------------|---------------|--------------------|----------------|---------------|--------------------|
|                                         | High Risk# OSA | Diagnosed OSA | Chi <sup>2</sup> P | High Risk# OSA | Diagnosed OSA | Chi <sup>2</sup> P |
|                                         | % (n)          | % (n)         |                    | % (n)          | % (n)         |                    |
| Heart disease                           | 8.8 (40)       | 23.3 (61)     | <0.001             | 6.7 (38)       | 11.1‡ (22)    | 0.050              |
| Angina or coronary artery disease       | 4.9 (22)       | 16.0 (42)     | <0.001             | 3.9 (22)       | 6.1‡ (12)     | 0.207              |
| Previous heart attack                   | 4.9 (22)       | 13.4 (35)     | <0.001             | 2.7 (15)       | 7.1‡ (14)     | 0.005              |
| Stroke, transient ischemic attack       | 3.5 (16)       | 9.5 (25)      | 0.001              | 3.0 (17)       | 7.6 (15)      | 0.006              |
| Atrial fibrillation/irregular heartbeat | 6.4 (29)       | 18.7 (49)     | <0.001             | 8.2 (46)       | 10.6‡ (21)    | 0.298              |

#OSA-50 score of  $\geq 5$  identified patients at high risk of having moderate to severe OSA.

‡  $P < 0.05$  for difference in distribution of chronic condition between males and females within participants with diagnosed OSA.
